# Supplementary material for: MoO2 nanosheets anchored with Co nanoparticles as a bifunctional electrocatalytic platform for overall water splitting
Source: Royal Society of Chemistry journal article supplement (doi:10.1039/d2ra06117a), 2022-01-01
Supplement: d2ra06117a1.pdf [file d2ra06117a1.pdf]

## Supporting Information

### **MoO<sub>2</sub> nanosheets anchored with Co nanoparticles as a bifunctional electrocatalytic platform for overall water splitting**

Lu Xia <sup>a</sup>, Yanjun Li <sup>a</sup>, Hao Song <sup>b,c</sup>, Xingxing Li <sup>b</sup>, Wenjie Gong <sup>a</sup>, Xinyu Jiang <sup>a</sup>,  
Mehran Javanbakht <sup>d</sup>, Xuming Zhang <sup>b</sup>, Biao Gao <sup>b,\*</sup>, Paul K. Chu <sup>c,\*</sup>

<sup>a</sup> The College of Resources and Environment Engineering and Hubei Key Laboratory for Efficient Utilization and Agglomeration of Metallurgic Mineral Resources, Wuhan University of Science and Technology, Wuhan 430081, China

<sup>b</sup> The State Key Laboratory of Refractories and Metallurgy and Institute of Advanced Materials and Nanotechnology, Wuhan University of Science and Technology, Wuhan 430081, China

<sup>c</sup> Department of Physics, Department of Materials Science and Engineering, and Department of Biomedical Engineering, City University of Hong Kong, Tat Chee Avenue, Kowloon, Hong Kong, China

<sup>d</sup> Renewable Energy Research Center, Amirkabir University of Technology, Tehran, Iran

\* Corresponding authors: [gaobiao@wust.edu.cn](mailto:gaobiao@wust.edu.cn) (B. Gao); [paul.chu@cityu.edu.hk](mailto:paul.chu@cityu.edu.hk) (P.K. Chu)

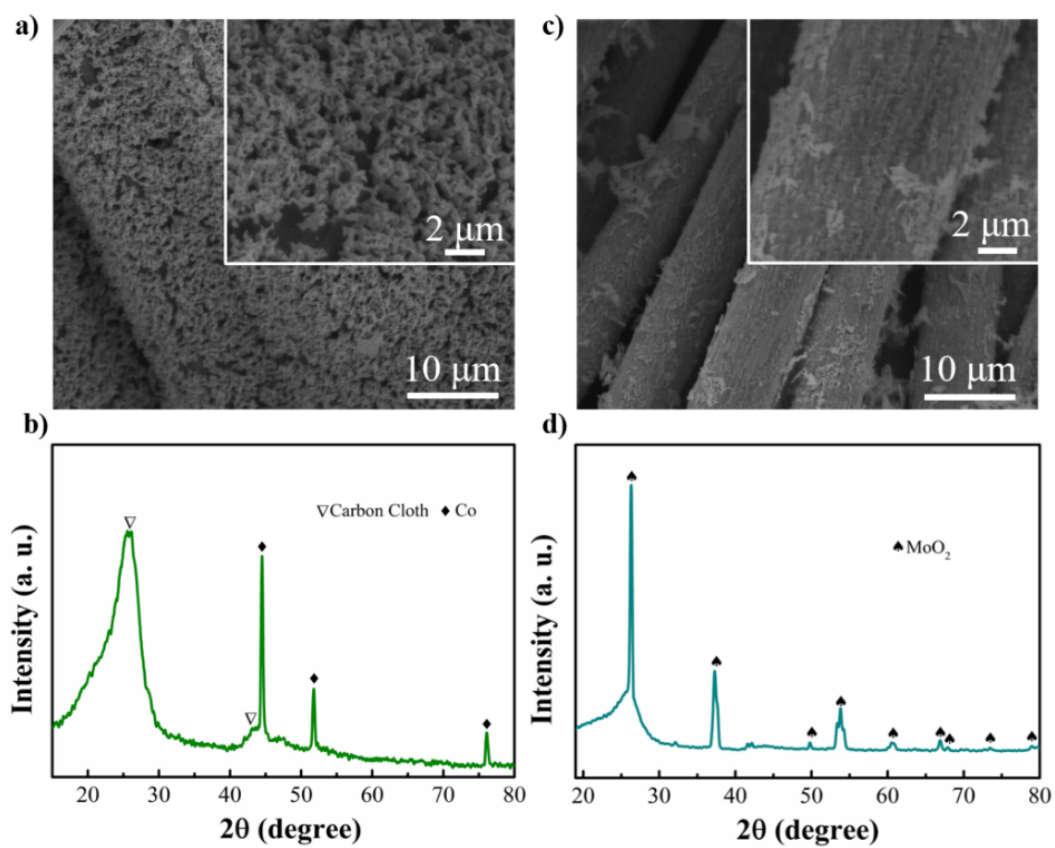

Fig. S1. FE-SEM images of (a) Co and (c) MoO<sub>2</sub> and XRD patterns of (b) Co and (d) MoO<sub>2</sub>.

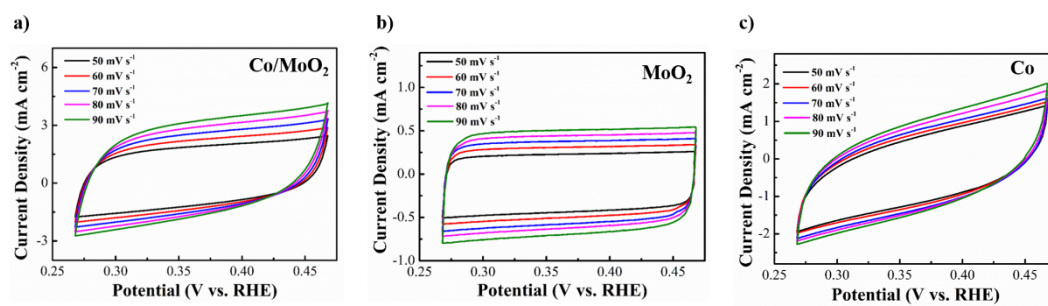

Fig. S2. Electrochemical double-layer capacitances and CV curves acquired at different scanning rates: (a) Co/MoO<sub>2</sub>, (b) MoO<sub>2</sub>, and (c) Co.

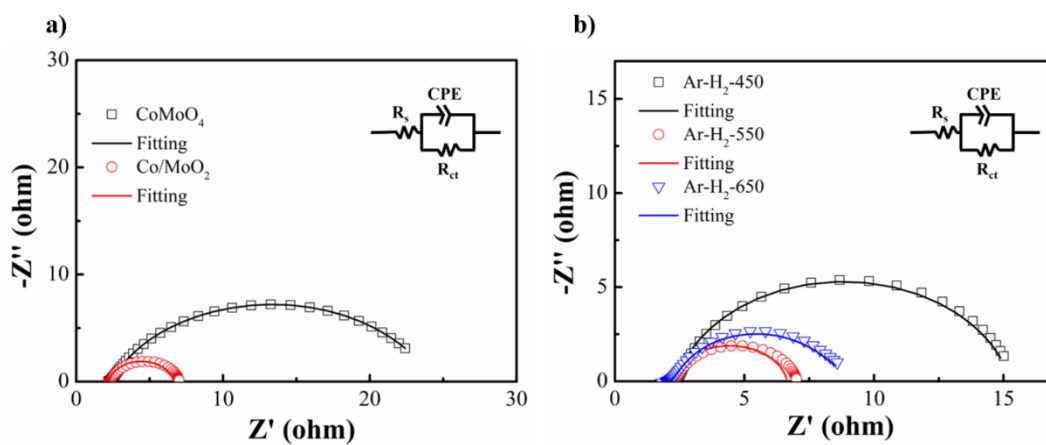

Fig. S3. Nyquist plots collected at 500 mV vs. SCE from (a)  $\text{CoMoO}_4$  and  $\text{Co/MoO}_2$  as well as (b)  $\text{Co/MoO}_2$  at different temperature.

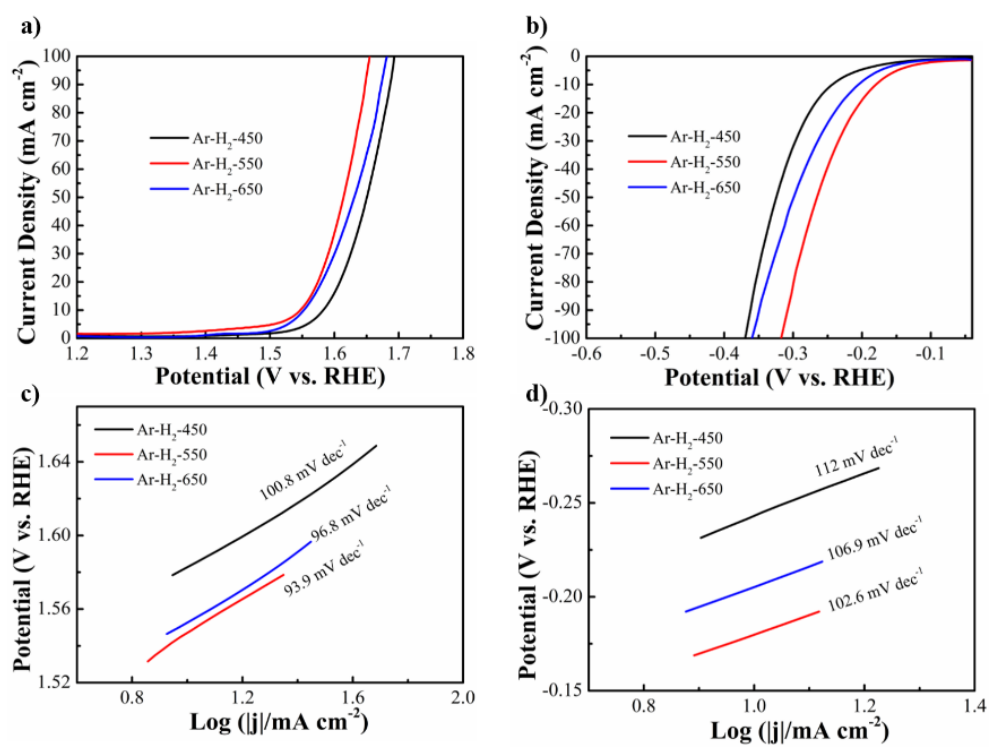

Fig. S4. (a) OER polarization curves of Co/MoO<sub>2</sub> at different temperature, (b) HER polarization curves of Co/MoO<sub>2</sub> at different temperature, (c) Tafel slopes in OER, and (d) Tafel slopes in HER.

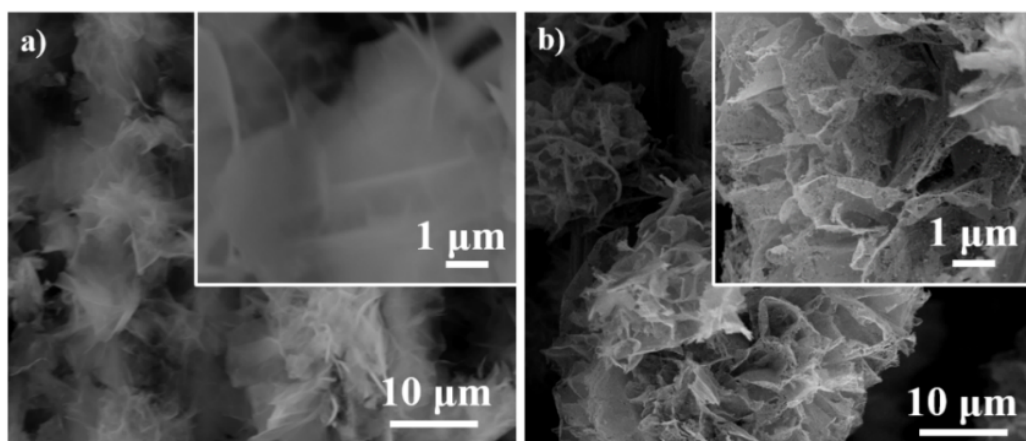

Fig. S5. FE-SEM images of (a) Co/MoO<sub>2</sub>-450 and (b) Co/MoO<sub>2</sub>-650.

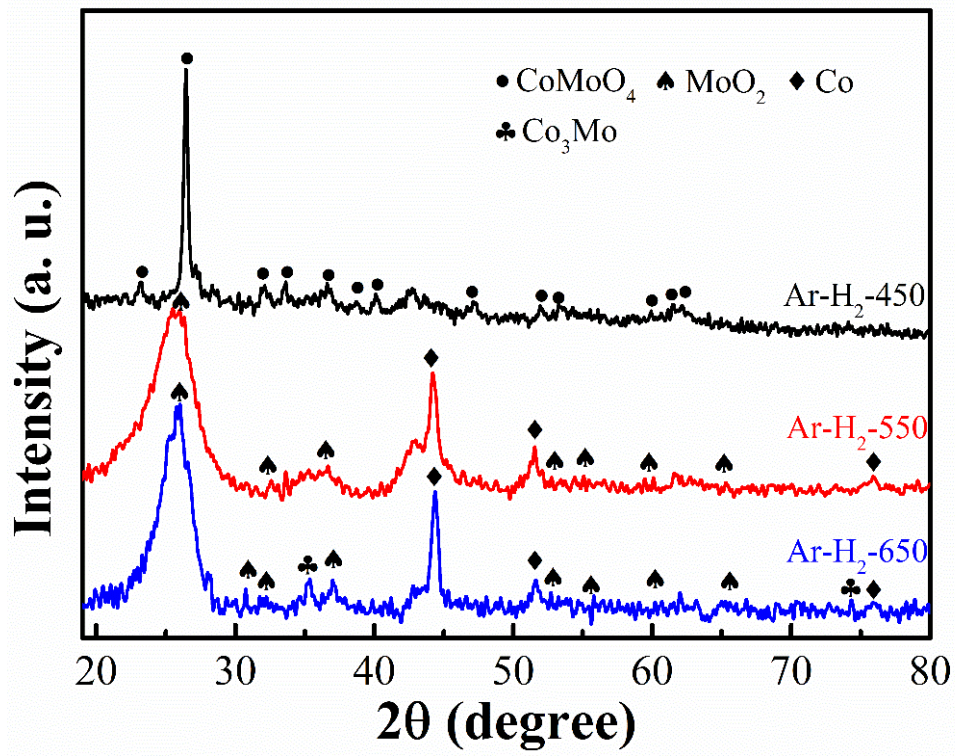

Fig. S6. XRD patterns of Co/MoO<sub>2</sub> at different temperature.

Table S1. Comparison of OER characteristics of recently reported non-noble electrocatalysts in alkaline media.

| Catalysts                                                               | Electrolytes | $\eta_{10}$ (mV vs.RHE) | References                                               |
|-------------------------------------------------------------------------|--------------|-------------------------|----------------------------------------------------------|
| Co/MoO <sub>2</sub> /CC                                                 | 1M KOH       | 318                     | This work                                                |
| CoMoO <sub>4</sub> /CC                                                  | 1M KOH       | 355                     | This work                                                |
|                                                                         |              |                         | <i>ACS Sustainable</i>                                   |
| MoO <sub>2</sub> /NF                                                    | 1M KOH       | 350                     | <i>Chem Eng, 2019, 7,</i><br><i>9153-9163.</i>           |
|                                                                         |              |                         | <i>ACS Appl Energy</i>                                   |
| MoO <sub>2</sub> +OH <sup>-</sup>                                       | 1M KOH       | 435                     | <i>Mater, 2020, 3, 5208-</i><br><i>5218.</i>             |
| MoO <sub>2</sub> -Co                                                    | 1M KOH       | 378                     | <i>Appl Surf Sci, 2021,</i><br><i>543, 148804.</i>       |
| MoO <sub>2</sub> -<br>Co <sub>2</sub> Mo <sub>3</sub> O <sub>8</sub> @C | 1M KOH       | 320                     | <i>Chem Commun, 2018,</i><br><i>54, 2739-2742.</i>       |
| Co <sub>2</sub> N <sub>0.67</sub> -BHPC                                 | 1M KOH       | 340                     | <i>J Energy Chem, 2021,</i><br><i>54, 626-638.</i>       |
| Co/ $\beta$ -Mo <sub>2</sub> C@N-CN<br>Ts                               | 1M KOH       | 356                     | <i>Angew Chem Int Ed,</i><br><i>2019, 58, 4923-4928.</i> |



Table S2. Comparison of HER characteristics of recently reported non-noble electrocatalysts in alkaline media.

| Catalysts                               | Electrolytes | $\eta_{10}$ (mV vs.RHE) | References                                                                                      |
|-----------------------------------------|--------------|-------------------------|-------------------------------------------------------------------------------------------------|
| Co/MoO <sub>2</sub> /CC                 | 1M KOH       | 178                     | This work                                                                                       |
| CoMoO <sub>4</sub> /CC                  | 1M KOH       | 272                     | This work                                                                                       |
| MoO <sub>2</sub>                        | 1M KOH       | 200                     | <i>Electrochim Acta</i> , 2020, 359, 136929.<br><i>ACS Sustainable</i>                          |
| MoO <sub>2</sub> /NF                    | 1M KOH       | 187                     | <i>Chem Eng</i> , 2019, 7, 9153-9163.                                                           |
| Co@ $\beta$ -Mo <sub>2</sub> C-NC-0.115 | 1M KOH       | 188                     | <i>J Electrochem Soc</i> , 2020, 167, 044520.                                                   |
| MoO <sub>2</sub> -Co                    | 1M KOH       | 422                     | <i>Appl Surf Sci</i> , 2021, 543, 148804.<br><i>Int J Hydrogen Energ</i> , 2019, 44, 6525-6534. |
| Co-CoO/BC                               | 1M KOH       | 210                     | <i>ACS Sustainable</i>                                                                          |
| Mo <sub>2</sub> C/MoO <sub>2</sub>      | 1M KOH       | 204                     | <i>Chem Eng</i> , 2018, 6, 14356-14364.                                                         |

Table S3. Comparison of the overall water splitting properties of recently reported non-noble electrocatalysts in alkaline media.

| Catalysts                                                               | Electrolytes | Current density j (mA cm <sup>-2</sup> ) | Voltage of overall water splitting (V) | Refs.                                              |
|-------------------------------------------------------------------------|--------------|------------------------------------------|----------------------------------------|----------------------------------------------------|
| Co/MoO <sub>2</sub> /CC                                                 | 1 M KOH      | 10                                       | 1.72                                   | This work                                          |
| Co@β-Mo <sub>2</sub> C-NC-0.115                                         | 1 M KOH      | 10                                       | 1.72                                   | <i>J Electrochem Soc</i> , 2020, 167, 044520.      |
| Co <sub>2</sub> P/Mo <sub>2</sub> C/Mo <sub>3</sub> Co <sub>3</sub> C@C | 1 M KOH      | 10                                       | 1.74                                   | <i>J Mater Chem A</i> , 2018, 6, 5789-5796.        |
| Co-CoO/BC                                                               | 1 M KOH      | 10                                       | 1.77                                   | <i>Int J Hydrogen Energ</i> , 2019, 44, 6525-6534. |
| P-MoO <sub>2</sub>                                                      | 1 M KOH      | 10                                       | 1.83                                   | <i>Fuel</i> , 2023, 332, 126250.                   |
| NiO/NiFe <sub>2</sub> O <sub>4</sub>                                    | 1 M KOH      | 10                                       | 1.82                                   | <i>Small</i> , 2021, 17, 2103501.                  |
